# Supplementary material
Source: Springer Nature journal article supplement (https://www.springermedizin.de/resource/supplementary/12890_2014_627_MOESM5_ESM.pdf/9505444)

# A BALF cell counts in mice treated with sActRIIB-Fc

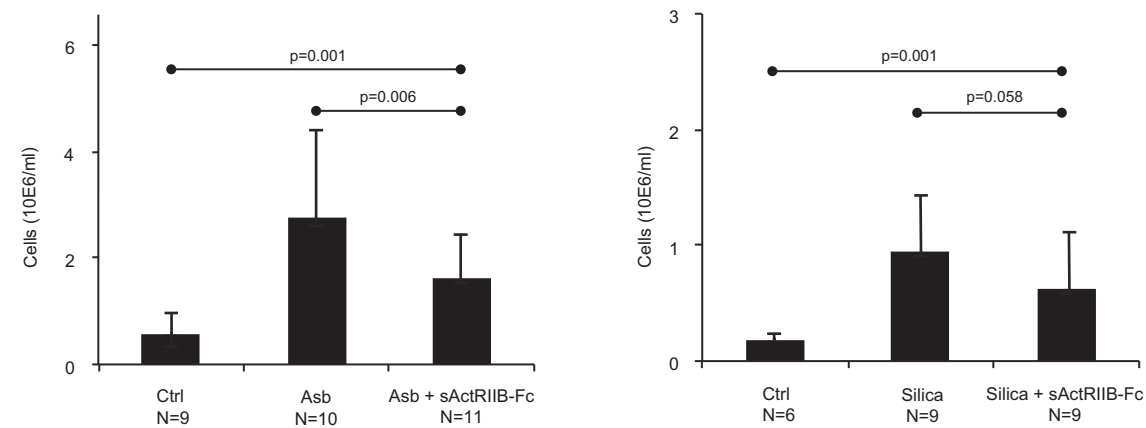

# B Tissue inflammation in mice treated with sActRIIB-Fc

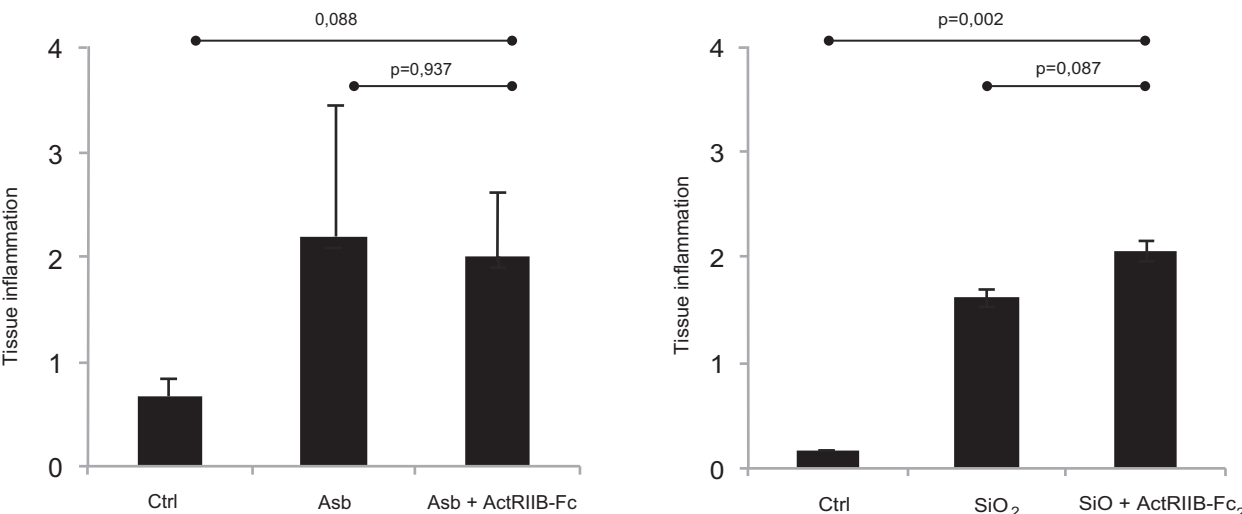

Supplement: MOESM5 [file 9505444]
